# Supplementary material for: Assembly of silver(i)–copper(i) bimetallic thiolate complexes assisted by phenylacetylene stabilizers
Source: Royal Society of Chemistry journal article supplement (doi:10.1039/d4dt02753a), 2024-11-25
Supplement: d4dt02753a1.pdf [file d4dt02753a1.pdf]

## Supporting Information

### Assembly of silver(I)-copper(I) bimetallic thiolate complexes assisting by phenacetylene stabilizers

Jun-Lin Jin<sup>\*a</sup>, Sheng-Fa Zhang<sup>a</sup>, Jun-Jie Fang<sup>b</sup>, Yang-Lin Shen<sup>c</sup>, Yun-Peng Xie<sup>\*b</sup> and Xing Lu<sup>b</sup>

<sup>a</sup>Henan Key Laboratory of Functional Salt Materials, Center for Advanced Materials Research, Zhongyuan University of Technology, Zhengzhou, 450007, China. E-mail: jinjunling@zut.edu.cn

<sup>b</sup>School of Materials Science and Engineering, Huazhong University of Science and Technology, Wuhan 430074, China. E-mail: xieyp@hust.edu.cn

<sup>c</sup>School of Materials and Chemical Engineering, Henan International Joint Laboratory of Rare Earth Composite Materials, Henan University of Engineering, Zhengzhou 451191, China

### Contents

**Table S1.** Summary of Ag/Cu bimetallic clusters.

**Table S2.** Crystal data and structure refinement for  $\text{Ag}_{11-x}\text{Cu}_x$ .

**Table S3.** Crystal data and structure refinement for  $\text{Ag}_{21}\text{Cu}_4$ .

**Fig. S1.** The main peak of ESI-MS results of  $\text{Ag}_{11-x}\text{Cu}_x$  and peak separation.

**Fig. S2.** EDS analysis of  $\text{Ag}_{11-x}\text{Cu}_x$ .

**Fig. S3.** Powder X-ray diffraction (PXRD) patterns of  $\text{Ag}_{11-x}\text{Cu}_x$ .

**Fig. S4.** Photoluminescence property of  $\text{Ag}_{11-x}\text{Cu}_x$  in  $\text{CH}_2\text{Cl}_2$  solution.

**Fig. S5.** Photoluminescence life analysis of  $\text{Ag}_{11-x}\text{Cu}_x$  in solid state.

**Fig. S6.** Temperature-dependent emission spectra of the  $\text{Ag}_{11-x}\text{Cu}_x$  cluster in the solid state ( $\lambda_{\text{ex}} = 467 \text{ nm}$ ).

**Fig. S7.** Photos of the single crystal under different excitation lights and temperature

**Fig. S8.** EDS analysis of  $\text{Ag}_{21}\text{Cu}_4$ .

**Fig. S9.** Overview structure of  $\text{Ag}_{27}$ .

**Fig. S10.** UV-vis absorption spectrum of  $\text{Ag}_{21}\text{Cu}_4$  in  $\text{CH}_2\text{Cl}_2$  solution.

### **X-ray crystallography**

Single crystal X-ray data of  $\text{Ag}_{11-x}\text{Cu}_x$  and  $\text{Ag}_{21}\text{Cu}_4$  were collected on a Bruker D8 Venture diffractometer with Mo-K $\alpha$  radiation ( $\lambda = 0.71073 \text{ \AA}$ ). Data processing, absorption correction, integration and reduction were performed by multi-scan method and implemented in software Bruker APEX3 v2017.3-0. The structure was refined by full-matrix least-squares techniques against F<sup>2</sup> using the SHELXL program.<sup>1</sup> Detailed crystal data and structure refinements for the compound are given in Tables S1 and S2. CCDC 2381276 and 2381277 contain the supplementary crystallographic data for this paper. All the atoms were refined anisotropically with the exception of some solvent molecules and hydrogen atoms were placed in calculated positions refined using idealized geometries and assigned fixed isotropic displacement parameters. Intrinsic disorder in the two structures was handled with different strategies according to the electron density distribution. Structure refinement was operated with different restraints and constraints (DANG, EADP, DFIX, etc.) in the corresponding crystallographic CIF files.<sup>2</sup> For structure  $\text{Ag}_{21}\text{Cu}_4$ , the H atoms of O2 and C110 were all omitted owing to the thermal vibration. Moreover, the X-ray intensity data of  $\text{Ag}_{21}\text{Cu}_4$  displayed no good quality because of the serious thermal vibration. The crystal structures are visualized

by DIAMOND 3.2. The detailed information of the crystal data, data collection and refinement results for all complexes are summarized in Tables S2 to Tables S3.

**Table S1.** Summary of Ag/Cu bimetallic clusters

| Cluster formula                                                                                                    | Synthesis method | reference        |
|--------------------------------------------------------------------------------------------------------------------|------------------|------------------|
| $[\text{Ag}_{11-x}\text{Cu}_x(\text{PrS})_9(\text{DPPM})_3]^{2+}$                                                  | Self-assembly    | <b>This work</b> |
| $[\text{Ag}_{21}\text{Cu}_4\text{S}_2(\text{tBuS})_{18}(\text{CH}_3\text{CN})_4]^{3+}$                             |                  |                  |
| $\text{Ag}_6\text{Cu}_8(\text{C}\equiv\text{CAr})_{14}(\text{DPPB})_2$                                             |                  | [3]              |
| $[\text{Cu}_2\text{Ag}_{10}(\text{C}\equiv\text{CR})_{12}(\text{PPh})_2]$                                          |                  | [4]              |
| $[(\text{SiW}_9\text{O}_{34})@\text{Ag}_{34}\text{Cu}_6(\text{tBuC}\equiv\text{C})_{18}(\text{tBuPO}_3)_9]$        |                  | [5]              |
| $[\text{Ag}_{10}\text{Cu}_6(\text{bdppthi})_2(\text{C}\equiv\text{CPh})_{12}]$                                     |                  | [6]              |
| $[\text{Cl}@\text{Ag}_8\text{Cu}_6(\text{C}\equiv\text{CFc})_{12}]^+$                                              |                  | [7]              |
| $\text{Ag}_6\text{Cu}(\text{C}\equiv\text{CR})_3[(\text{PPh}_2)_3\text{CH}]_2(\text{PPh}_2\text{O}_2)$             |                  | [8]              |
| $[\text{Ag}_6\text{Cu}_2(\mu\text{-Ph}_2\text{PCH}_2\text{PPh}_2)_3(\text{C}\equiv\text{CR})_6(\text{MeCN})]^{2+}$ |                  | [9]              |
| $[\text{Ag}_{12}\text{Cu}_2(\mu\text{-tpmp})_2(\text{C}\equiv\text{CR})_{12}]^{2+}$                                |                  | [10]             |
| $[\text{Ag}_{16}\text{Cu}_9(\mu\text{-dpepp})_3(\text{C}\equiv\text{CR})_{20}]$                                    |                  | [11]             |
| $[\text{Ag}_{62-x}\text{Cu}_x\text{S}_{12}(\text{tBuS})_{32}]^{4+}$                                                | Template-method  | [12]             |
| $[\text{Ag}@\text{Cu}_{12}(\text{S}_2\text{CN}^n\text{Bu}_2)_6(\text{C}\equiv\text{CPh})_4][\text{CuCl}_2]$        |                  | [13]             |
| $[\text{Ag}_8\text{Cu}_6(\text{C}\equiv\text{C}^n\text{Bu})_{12}\text{X}]\text{BF}_4$                              |                  | [14]             |
| $\text{Ag}_{10}\text{Cu}_4(\text{C}\equiv\text{CAr})_{14}(\text{DPPB})_2$                                          |                  | [15]             |
| $[\text{Ag}_8\text{Cu}_7(\text{tBuC}\equiv\text{C})_{12}]^+$                                                       | Co-reduction     | [15]             |
| $[\text{Ag}_9\text{Cu}_6(\text{tBuC}\equiv\text{C})_{12}]^+$                                                       |                  | [16]             |
| $\text{Ag}_{12}\text{Cu}_4(\text{C}\equiv\text{CR})_{14}(\text{PPh}_3)_4$                                          |                  | [17]             |
| $[\text{Ag}_{22}\text{Cu}_7(\text{C}\equiv\text{CR})_{16}(\text{PPh}_3)_5\text{Cl}_6](\text{PPh}_4)$               |                  | [18]             |
| $[\text{Ag}_{27}\text{Cu}_4\text{Br}_2(\text{FUR})_{20}(\text{TPP})_{10}]^{3+}$                                    |                  | [19]             |
| $\text{Ag}_{20}\text{Cu}_{12}(\text{C}\equiv\text{CAr})_{24}$                                                      |                  | [20]             |
| $[\text{Ag}_{37}\text{Cu}_2(\text{PFBT})_{24}(\text{TPP})_8]^{2-}$                                                 |                  | [21]             |
| $\text{Ag}_{77}\text{Cu}_{22}(\text{CHT})_{48}$                                                                    |                  | [22]             |
| $(^n\text{Bu}_4\text{N})_4[\text{Ag}_{28}\text{Cu}_{12}(\text{SR})_{24}]$                                          |                  | [23]             |
| $[\text{Ag}_{40.13}\text{Cu}_{13.87}\text{S}_{19}(\text{tBuS})_{20}(\text{tBuSO}_3)_{12}]$                         |                  | [24]             |

|                                                                                                                     |              |      |
|---------------------------------------------------------------------------------------------------------------------|--------------|------|
| $\text{Ag}_{30}\text{Cu}_{14}(\text{TPP})_4(\text{SR})_{28}$                                                        | Co-reduction | [25] |
| $[\text{Ag}_{61}\text{Cu}_{30}(\text{SAdm})_{38}\text{S}_3](\text{BPh}_4)$                                          |              | [26] |
| $\text{Ag}_{13}\text{Cu}_{10}(\text{SAdm})_{12}\text{X}_3$                                                          |              | [27] |
| $[\text{Ag}_{32}\text{Cu}_{12}(\text{CH}_3\text{COO})_{12}(\text{SAdm})_{12}(\text{P}(\text{CH}_3\text{OPh})_3)_4]$ |              | [28] |
| $[\text{PPh}_4]_4[\text{Ag}_{32}\text{Cu}_{18}(\text{PFBT})_{36}]$                                                  |              | [29] |
| $\text{Ag}_{15}\text{Cu}_{12}(\text{SR})_{18}(\text{CH}_3\text{COO})_3 \cdot (\text{C}_6\text{H}_{14})$             |              | [30] |
| $[\text{Ag}_{15}\text{Cu}_6(\text{C}\equiv\text{CR})_{18}(\text{DPPE})_2]^-$                                        |              | [31] |
| $(\text{Ph}_4\text{P})_2[\text{Ag}_{22}\text{Cu}_{12}(\text{C}\equiv\text{CR})_{28}]$                               |              | [32] |
| $(\text{Ph}_4\text{P})_3[\text{Ag}_{42}\text{Cu}_{12}\text{Cl}(\text{C}\equiv\text{CR})_{36}]$                      |              | [32] |

**Table S2.** Crystal data and structure refinement for **Ag<sub>11-x</sub>Cu<sub>x</sub>**

|                                   |                                                                                                                           |
|-----------------------------------|---------------------------------------------------------------------------------------------------------------------------|
| Empirical formula                 | [Ag <sub>11-x</sub> Cu <sub>x</sub> ( <sup>i</sup> PrS) <sub>9</sub> (DPPM) <sub>3</sub> ](PF <sub>6</sub> ) <sub>2</sub> |
| Formula weight                    | 3088.60                                                                                                                   |
| Crystal system                    | Triclinic                                                                                                                 |
| Space group                       | <i>P</i> -1                                                                                                               |
| a                                 | 18.2666(13) Å                                                                                                             |
| b                                 | 21.1885(14) Å                                                                                                             |
| c                                 | 21.1999(14) Å                                                                                                             |
| α                                 | 60.445(2)°                                                                                                                |
| β                                 | 64.889(2)°                                                                                                                |
| γ                                 | 86.266(2)°                                                                                                                |
| Volume                            | 6353.8(8) Å <sup>3</sup>                                                                                                  |
| Z                                 | 2                                                                                                                         |
| ρ <sub>calc</sub>                 | 1.622 Mg/m <sup>3</sup>                                                                                                   |
| Absorption coefficient            | 2.027 mm <sup>-1</sup>                                                                                                    |
| F(000)                            | 3096                                                                                                                      |
| Crystal color and habit           | Orange                                                                                                                    |
| Theta range for data collection   | 2.767 to 23.256°                                                                                                          |
| Index ranges                      | -20 ≤ h ≤ 20, -23 ≤ k ≤ 23, -23 ≤ l ≤ 23                                                                                  |
| Reflections collected             | 86630                                                                                                                     |
| Independent reflections           | 18212 [R(int) = 0.0634]                                                                                                   |
| Goodness-of-fit on F <sup>2</sup> | 1.038                                                                                                                     |
| Final R indices [I > 2σ(I)]       | R1 = 0.0543, wR2 = 0.1388                                                                                                 |
| R indices (all data)              | R1 = 0.0935, wR2 = 0.1647                                                                                                 |
| Largest diff. peak and hole       | 2.024 and -0.890 e.Å <sup>-3</sup>                                                                                        |
| CCDC number                       | 2381276                                                                                                                   |

**Table S3.** Crystal data and structure refinement for **Ag<sub>21</sub>Cu<sub>4</sub>**

|                                   |                                                                                                                                                                                              |
|-----------------------------------|----------------------------------------------------------------------------------------------------------------------------------------------------------------------------------------------|
| Empirical formula                 | [Ag <sub>21</sub> S <sub>2</sub> Cu <sub>4</sub> ( <sup>t</sup> BuS) <sub>18</sub> (CH <sub>3</sub> CN) <sub>4</sub> ](CH <sub>3</sub> OH) <sub>2</sub> (H <sub>3</sub> O)(PF <sub>6</sub> ) |
| Formula weight                    | 4<br>5032.85                                                                                                                                                                                 |
| Crystal system                    | Triclinic                                                                                                                                                                                    |
| Space group                       | <i>P</i> -1                                                                                                                                                                                  |
| a                                 | 14.7623(9) Å                                                                                                                                                                                 |
| b                                 | 17.4036(12) Å                                                                                                                                                                                |
| c                                 | 17.9645(11) Å                                                                                                                                                                                |
| α                                 | 111.478(2)°                                                                                                                                                                                  |
| β                                 | 110.109(2)°                                                                                                                                                                                  |
| γ                                 | 98.581(2)°                                                                                                                                                                                   |
| Volume                            | 3828.0(4) Å <sup>3</sup>                                                                                                                                                                     |
| Z                                 | 1                                                                                                                                                                                            |
| $\rho_{\text{calc}}$              | 2.183 Mg/m <sup>3</sup>                                                                                                                                                                      |
| Absorption coefficient            | 3.539 mm <sup>-1</sup>                                                                                                                                                                       |
| F(000)                            | 2380                                                                                                                                                                                         |
| Crystal color and habit           | Orange                                                                                                                                                                                       |
| Theta range for data collection   | 2.791 to 22.722°                                                                                                                                                                             |
| Index ranges                      | -17 ≤ h ≤ 17, -20 ≤ k ≤ 20, -21 ≤ l ≤ 21                                                                                                                                                     |
| Reflections collected             | 31005                                                                                                                                                                                        |
| Independent reflections           | 13653 [R(int) = 0.0713]                                                                                                                                                                      |
| Goodness-of-fit on F <sup>2</sup> | 1.006                                                                                                                                                                                        |
| Final R indices [I > 2σ(I)]       | R1 = 0.0625, wR2 = 0.1554                                                                                                                                                                    |
| R indices (all data)              | R1 = 0.1101, wR2 = 0.1801                                                                                                                                                                    |
| Largest diff. peak and hole       | 1.753 and -2.333 e Å <sup>-3</sup>                                                                                                                                                           |
| CCDC number                       | 2381277                                                                                                                                                                                      |

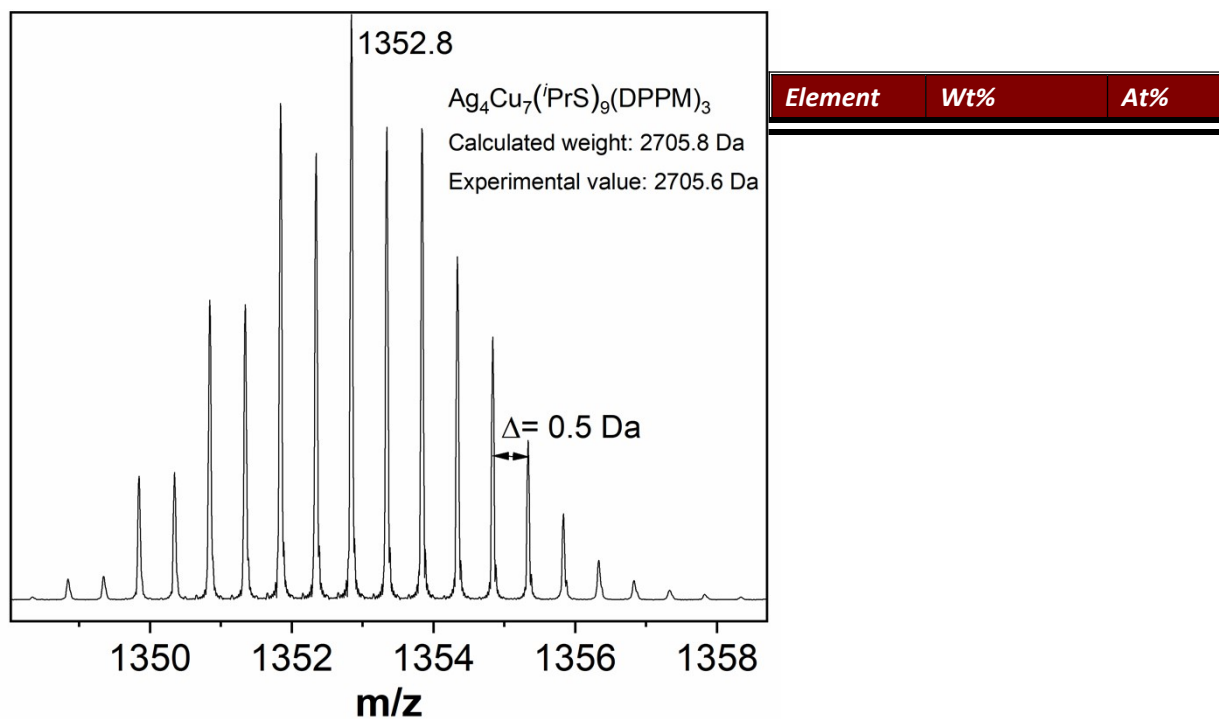

**Fig. S1.** the main peak of ESI-MS results of  $\text{Ag}_{11-x}\text{Cu}_x$  and peak separation.

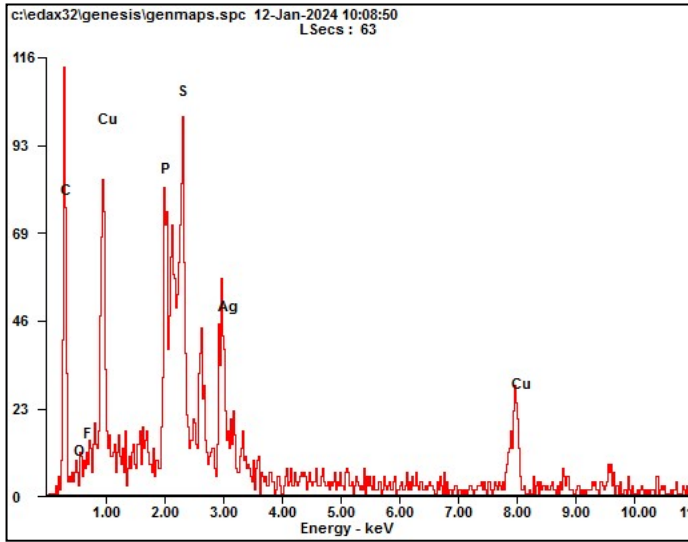

**Fig. S2.** EDS analysis of  $\text{Ag}_{11-x}\text{Cu}_x$ .

|               |            |       |
|---------------|------------|-------|
| <b>CK</b>     | 57.21      | 82.09 |
| <b>OK</b>     | 02.37      | 02.55 |
| <b>FK</b>     | 02.86      | 02.59 |
| <b>PK</b>     | 06.44      | 03.58 |
| <b>SK</b>     | 07.88      | 04.24 |
| <b>AgL</b>    | 12.16      | 01.94 |
| <b>CuK</b>    | 11.08      | 03.01 |
| <b>Matrix</b> | Correction | ZAF   |



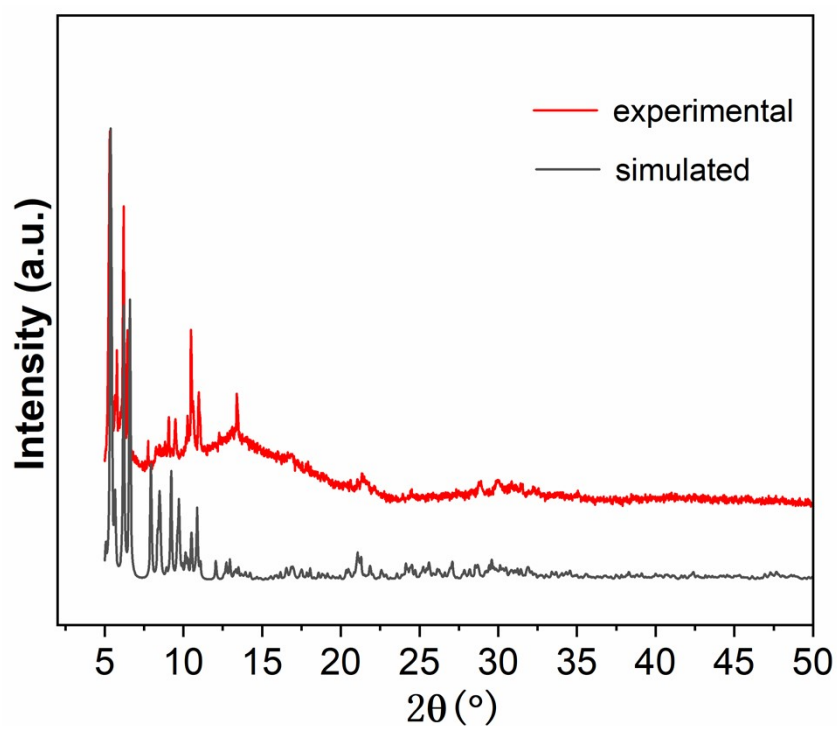

**Fig. S3.** Powder X-ray diffraction (PXRD) patterns of  $\text{Ag}_{11-x}\text{Cu}_x$ .

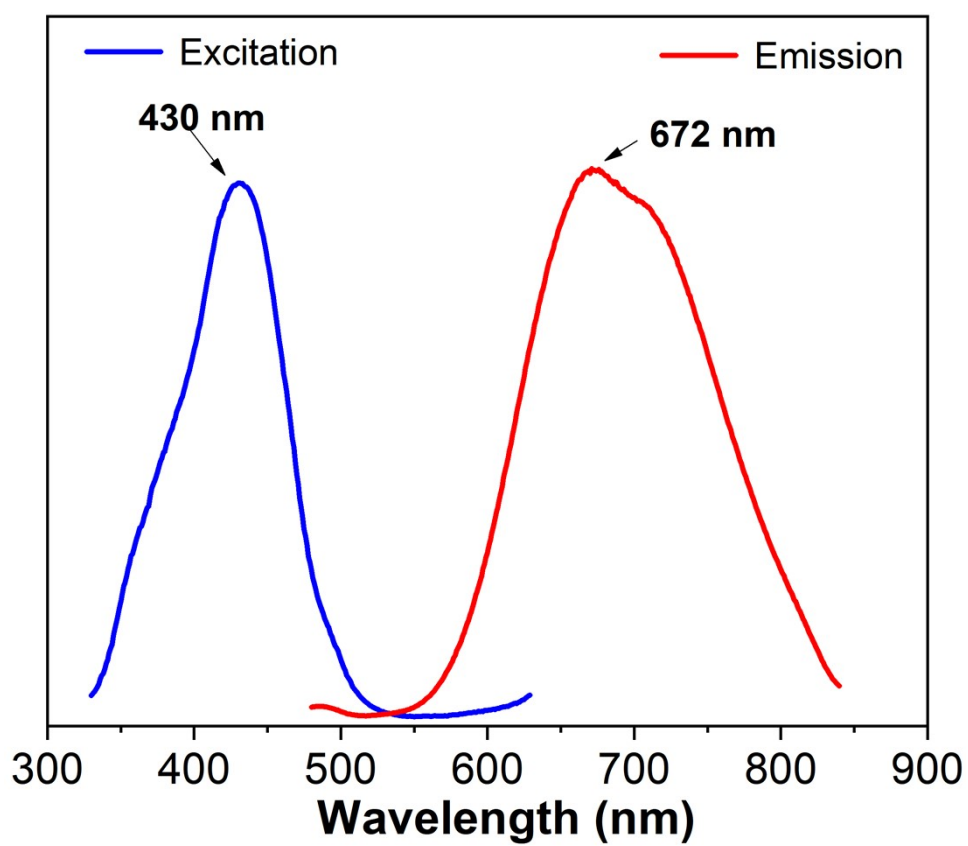

Fig. S4. Photoluminescence property of  $\text{Ag}_{11-x}\text{Cu}_x$  in  $\text{CH}_2\text{Cl}_2$  solution.

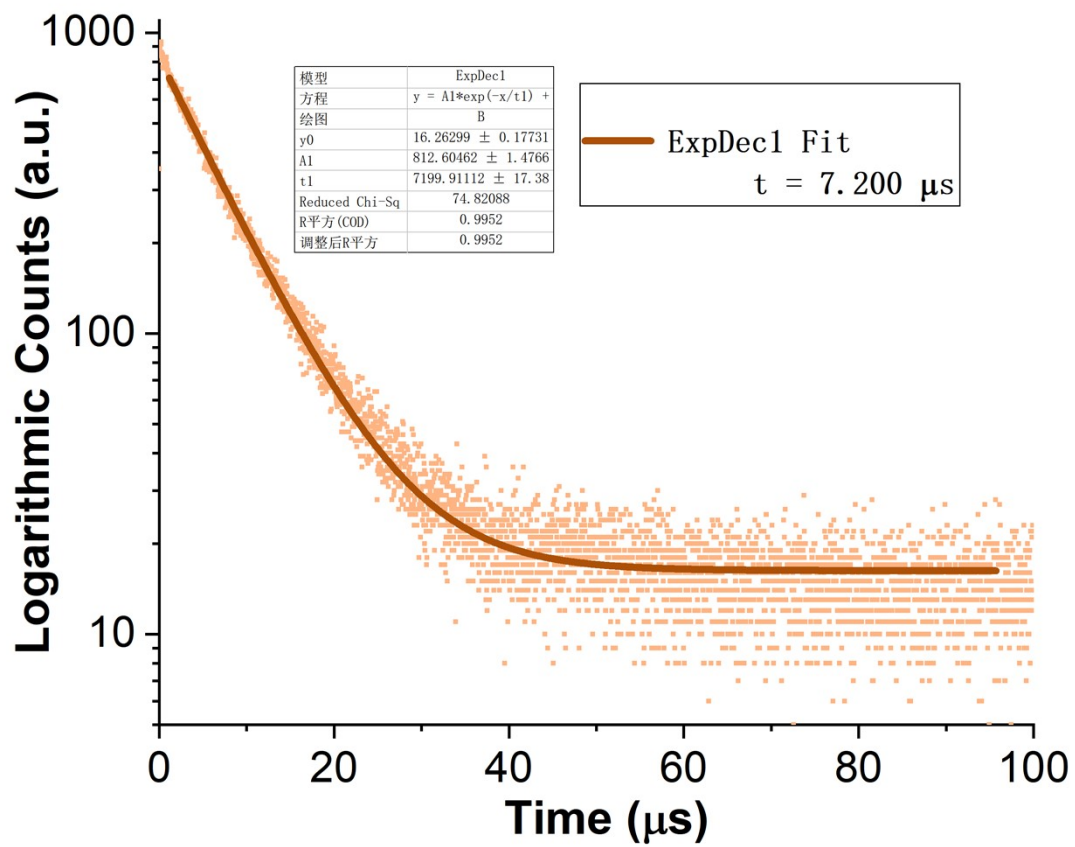

Fig. S5. Photoluminescence life analysis of  $Ag_{11-x}Cu_x$  in solid state.

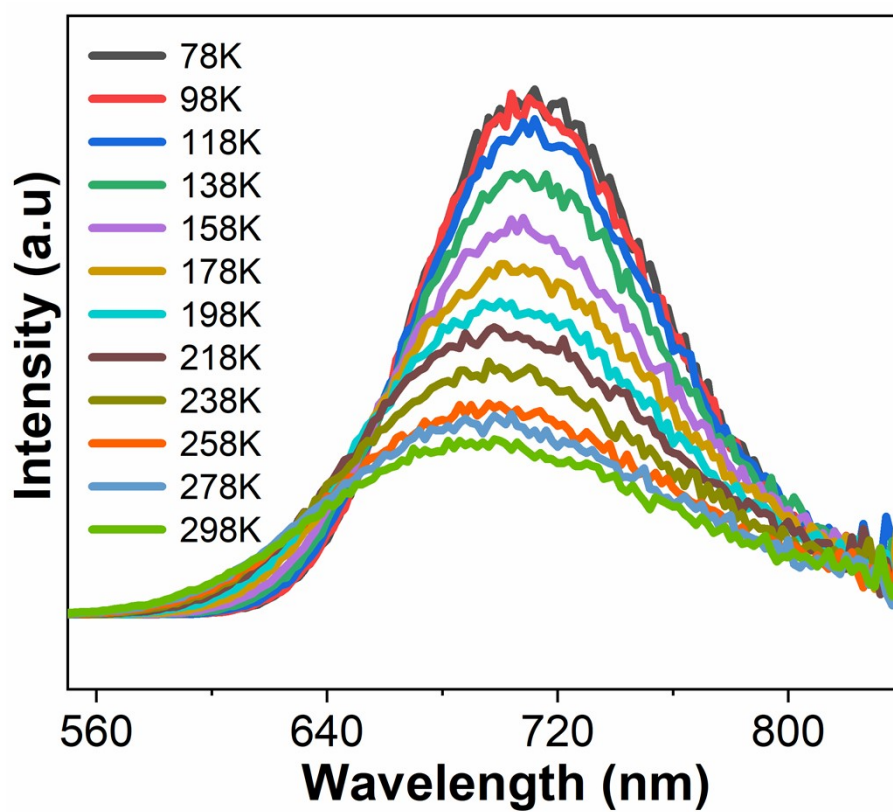

**Fig. S6.** Temperature-dependent emission spectra of the  $\text{Ag}_{11-x}\text{Cu}_x$  cluster in the solid state ( $\lambda_{\text{ex}} = 467 \text{ nm}$ ).

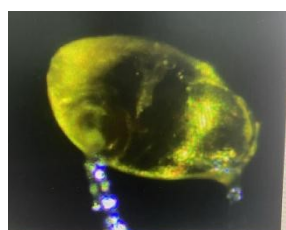

fluorescent lamp

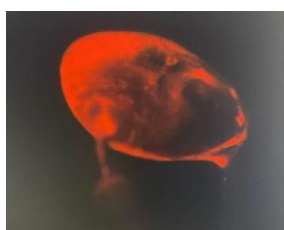

365nm UV light/290 K

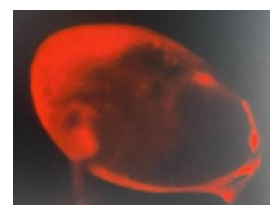

365nm UV light/173 K

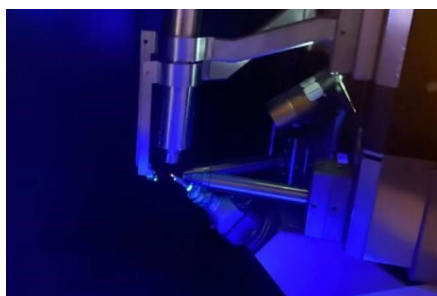

Test Platform

**Fig. S7.** Photos of the single crystal under different excitation lights and temperature (The shadow on the surface of the single crystal is due to the use of glue to fix the single crystal on loop).

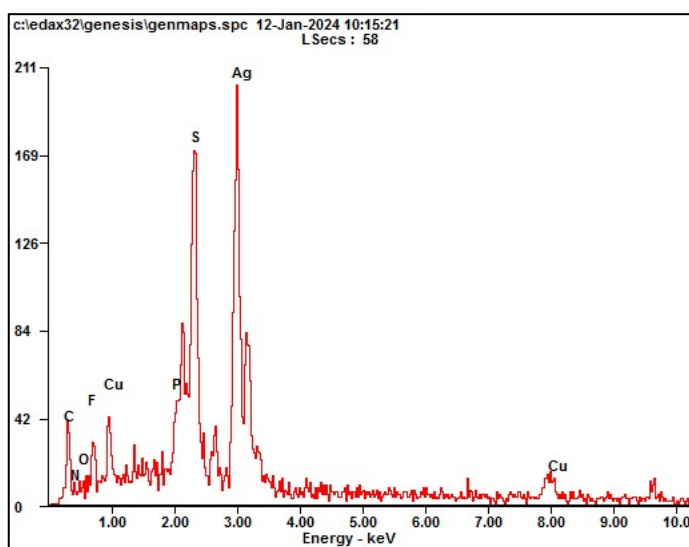

| <b>Element</b> | <b>Wt%</b> | <b>At%</b> |
|----------------|------------|------------|
| <b>CK</b>      | 21.30      | 51.60      |
| <b>NK</b>      | 01.70      | 03.53      |
| <b>OK</b>      | 00.77      | 01.40      |
| <b>FK</b>      | 08.44      | 12.93      |
| <b>PK</b>      | 03.48      | 03.27      |
| <b>SK</b>      | 13.98      | 12.68      |
| <b>AgL</b>     | 44.97      | 12.13      |
| <b>CuK</b>     | 05.35      | 02.45      |
| <b>Matrix</b>  | Correction | ZAF        |

**Fig. S8.**EDS analysis of  $\text{Ag}_{21}\text{Cu}_4$ .

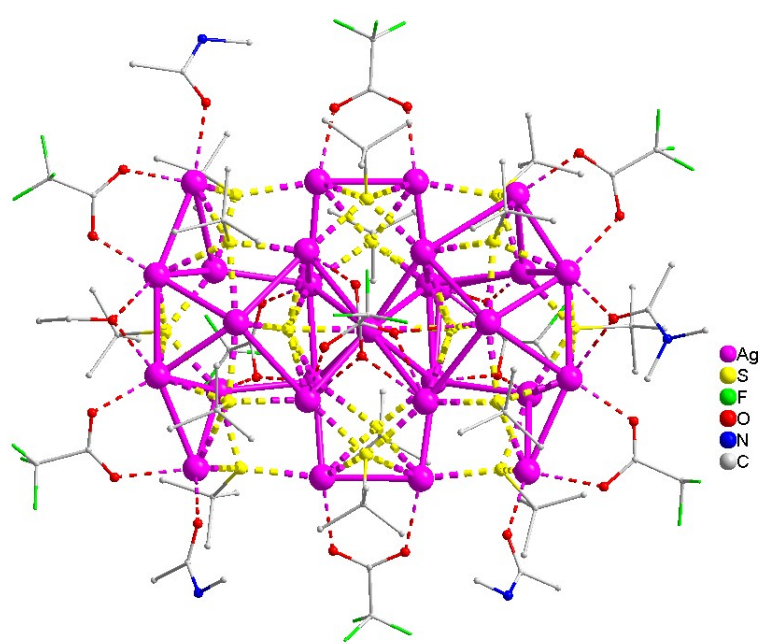

**Fig. S9.** Overview structure of Ag<sub>27</sub>.

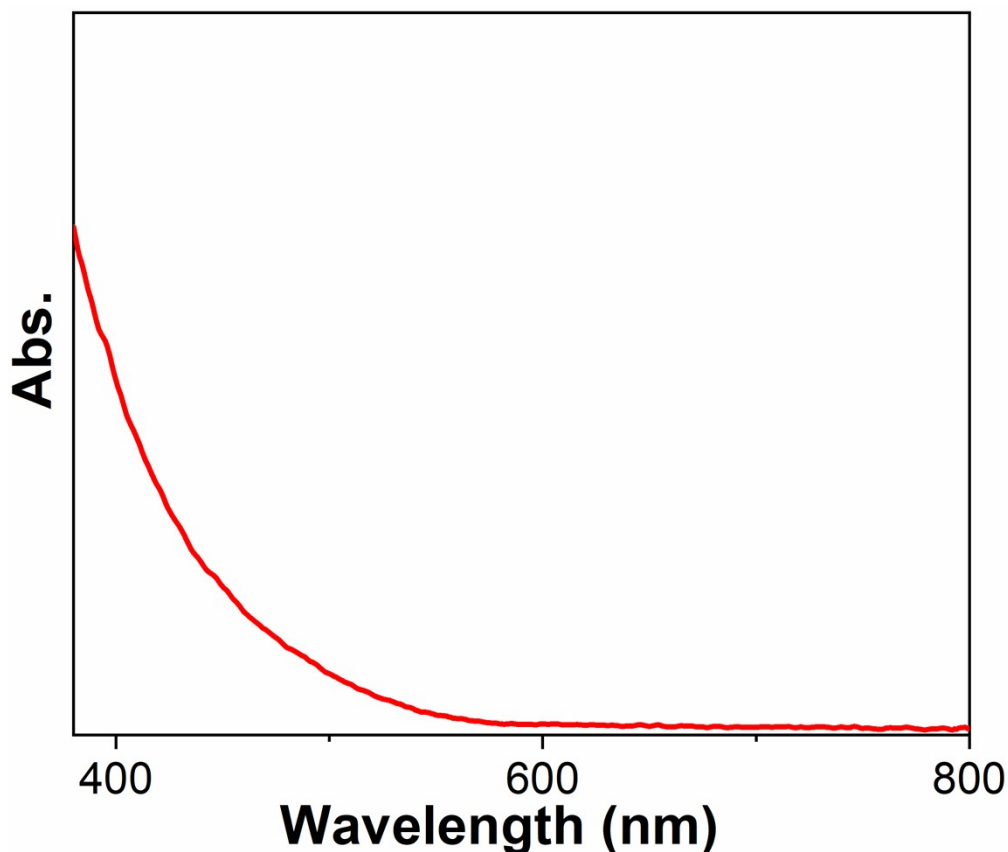

Fig. S10. UV-vis absorption spectrum of  $\text{Ag}_{21}\text{Cu}_4$  in  $\text{CH}_2\text{Cl}_2$  solution.

## Reference

- [1] G. M. Sheldrick, *Acta Crystallogr., A Found. Adv.* **2015**, A71, 3–8.
- [2] Guzei, I. A. *J. Appl. Crystallogr.* **2014**, 47, 806-809.
- [3] J.-L. Jin, S.-F. Zhang, P. Zhao, Y.-L. Shen, J.-J. Fang, Z. Liu, M. Ehara, L.-W. Mi, Y.-P. Xie, X. Lu, *Chem.-Asian J.* **2023**, 18, e202300844.
- [4] S. C. K. Hau, M. C. L. Yeung, V. W. W. Yam, T. C. W. Mak, *J. Am. Chem. Soc.* **2016**, 138, 13732.
- [5] G.-X. Duan, Y.-P. Xie, J.-L. Jin, L.-P. Bao, X. Lu, T. C. W. Mak, *Chem. Eur. J.* **2018**, 24, 6762.
- [6] Y. Wang, J.-J. Yan, S. Hu, Y. D. James, H.-X. Li, Z.-G. Ren, *Chem.-Asian J.* **2021**, 16, 2681.
- [7] Q.-H. Wei, G.-Q. Yin, L.-Y. Zhang, and Z.-N. Chen, *Organometallics* **2006**, 25,

4941.

- [8] L.-J. Xu, X. Zhang, J.-Y. Wang and Z.-N. Chen, *J. Mater. Chem. C*, **2016**, 4, 1787.
- [9] Q.-H. Wei, G.-Q. Yin, L.-Y. Zhang, L.-X. Shi, Z.-W. Mao and Z.-N. Chen, *Inorg. Chem.* **2004** 43, 3484.
- [10] X. Zhang, J.-Y. Wang, D. Qiao and Z.-N. Chen, *J. Mater. Chem. C*, **2017**, 5, 8782.
- [11] Z.-H. Chen, L.-Y. Zhang and Z.-N. Chen, *Organometallics* **2012**, 31, 256.
- [12] J. Zhou, S. Yang, Y. Tan, H. Cheng, J. Chai, M. Zhu, *Chem.-Asian J.* **2021**, 16, 2973.
- [13] R. P. B. Silalahi, K. K. Chakrahari, J.-H. Liao, S. Kahlal, Y.-C. Liu, M.-H. Chiang, J.-Y. Saillard, C. W. Liu, *Chem.-Asian J.* **2018**, 13, 500.
- [14] T. U. Connell, S. Sandanayake, G. N. Khairallah, J. M. White, R. A. J. O'Hair, P. S. Donnelly, S. J. Williams, *Dalton Trans.* **2013**, 42, 4903.
- [15] Y.-L. Shen, D. Liu, X. Li, *J. Clust. Sci.* **2024**, 35, 1959.
- [16] X. Ma, L. Xiong, L. Qin, Y. Tang, G. Ma, Y. Pei and Z. Tang, *Chem. Sci.* **2021** 12, 12819.
- [17] G. Deng, K. Lee, H. Deng, M. S. Bootharaju, N. Zheng and T. Hyeon, *J. Phys. Chem. C* **2022**, 126, 20577.
- [18] G. Deng, K. Lee, H. Deng, S. Malola, M. S. Bootharaju, H. Häkkinen, N. Zheng and T. Hyeon, *Angew. Chem. Int. Ed.* **2023**, 62, e202217483.
- [19] L. Fang, W. Fan, G. Bian, R. Wang, Q. You, W. Gu, N. Xia, L. Liao, J. Li, H. Deng, N. Yan and Z. Wu, *Angew. Chem. Int. Ed.* **2023**, 62, e202305604.
- [20] G. Ma, F. Sun, L. Qiao, Q. Shen, L. Wang, Q. Tang and Z. Tang, *Nano Res.* **2023**, 16, 10867.
- [21] X.-H. Ma, Y. Si, L.-L. Luo, Z.-Y. Wang, S.-Q. Zang and T. C. W. Mak, *ACS Nano* **2022**, 16, 5507.
- [22] N. Xia, J. Xing, D. Peng, S. Ji, J. Zha, N. Yan, Y. Su, X. Jiang, Z. Zeng, J. Zhao and Z. Wu, *Nat. Commun.* **2022**, 13, 5934.
- [23] J. Yan, H. Su, H. Yang, C. Hu, S. Malola, S. Lin, B. K. Teo, H. Häkkinen and N. Zheng, *J. Am. Chem. Soc.* 2016, **138**, 12751.



- [24] S. Yang, J. Chai, H. Chong, Y. Song, H. Yu and M. Zhu, *Chem. Commun.* **2018**, 54, 4314.
- [25] J. Li, H. Li, H. Yu, J. Chai, Q. Li, Y. Song, Z. Zhang and M. Zhu, *Dalton Trans.* **2020**, 49, 7684.
- [26] X. Zou, Y. Li, S. Jin, X. Kang, X. Wei, S. Wang, X. Meng and M. Zhu, *J. Phys. Chem. Lett.* **2020**, 11, 2272 .
- [27] Y. Bao, X. Wu, H. Gao, M. Zhou, S. Chen, S. Jin, H. Yu and M. Zhu, *Dalton Trans.* **2020**, 49, 17164.
- [28] J. Chai, S. Yang, T. Chen, Q. Li, S. Wang and M. Zhu, *Inorg. Chem.* **2021**, 60, 9050.
- [29] X.-H. Ma, J.-T. Jia, P. Luo, Z.-Y. Wang, S.-Q. Zang and T. C. W. Mak, *Nano Res.* **2022**, 15, 5569.
- [30] Z. Lin, T. Zhang, C. Fang, S. Jin, C. Xu, D. Hu and M. Zhu, *Dalton Trans.* **2023**, 52, 971.
- [31] G. Deng, J. Kim, M. S. Bootharaju, F. Sun, K. Lee, Q. Tang, Y. J. Hwang and T. Hyeon, *J. Am. Chem. Soc.* **2023**, 145, 3401.
- [32] F. Hu, Z.-J. Guan, S.-F. Yuan and Q.-M. Wang, *Chem. Asian J.* **2023**, 18, e202300605.
